# Supplementary material for: Cisplatin and oleanolic acid Co-loaded pH-sensitive CaCO3nanoparticles for synergistic chemotherapy
Source: Royal Society of Chemistry journal article supplement (doi:10.1039/d2ra00742h), 2022-01-01
Supplement: d2ra00742h1.pdf [file d2ra00742h1.pdf]

**This ESI replaces the version published on 16<sup>th</sup> May 2022 due to some errors, the scientific content remains unchanged.**

## **Cisplatin and Oleanolic acid Co-loaded pH-Sensitive CaCO<sub>3</sub> Nanoparticles for Synergistic Chemotherapy**

Muhammad Waseem Khan<sup>a,\*</sup>, Chenming Zou<sup>c</sup>, Said Hassan<sup>c</sup>, Fakhar Ud Din<sup>d</sup>, Mahaman Yacoubou Abdoul Razak<sup>e</sup>, Asif Nawaz<sup>f</sup>, Alam zeb<sup>g</sup>, Abdul Wahab<sup>h</sup>, Sudhair Abbas Bangash<sup>i</sup>.

<sup>a</sup>Institute of Pharmaceutical Sciences, Khyber Medical University, Peshawar, Pakistan.

<sup>b</sup>School of Pharmacy, Tongji Medical College, Huazhong University of Science and Technology, Wuhan, Hubei 430030, China.

<sup>c</sup>Institute of Biotechnology and Microbiology, Bacha Khan University, Charsadda, Pakistan.

<sup>d</sup>Department of Pharmacy, Quaid-I-Azam University, Islamabad 45320, Pakistan.

<sup>e</sup>Department of Pathophysiology, School of Basic Medicine, Key Laboratory of Education Ministry of China for Neurological Disorders, Tongji Medical College, Huazhong University of Science and Technology, Wuhan 430030, China

<sup>f</sup>Faculty of Pharmacy, Gomal University, Dera Ismail Khan, Pakistan

<sup>g</sup>Riphah Institute of Pharmaceutical Sciences, Riphah International University, Islamabad, Pakistan.

<sup>h</sup>Department of Pharmacy, Kohat University of Science and Technology, Kohat, Pakistan.

<sup>i</sup>Faculty of Life Science, Department of Pharmacy, Sarhad University of Science and Information Technology, Peshawar, Pakistan.

**\* Corresponding author.**

**Postal addresses:** Institute of Pharmaceutical Sciences, Khyber Medical University, Phase 5, Hayatabad, Peshawar, KP, Pakistan.

**E-mail addresses:** khanwaseem6065@gmail.com

**Tel.:** +92-3459146065

## Supplementary Information

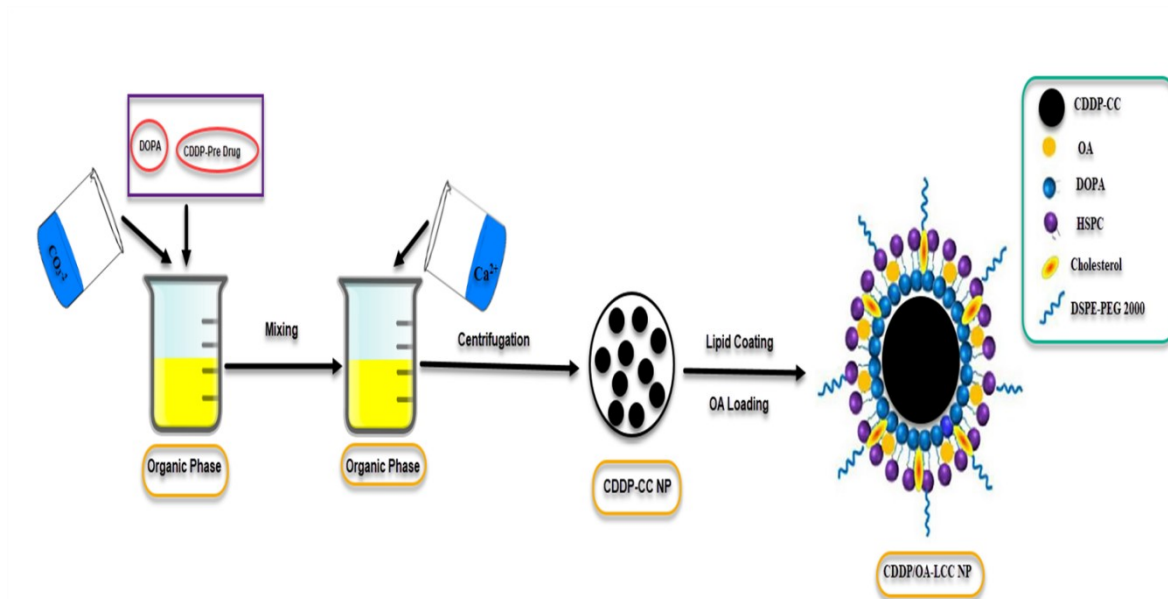

**Supplementary Fig. S1.** Schematic illustration of the formulation of lipid coated cisplatin/oleanolic acid co-loaded calcium carbonate nanoparticles (CDDP/OA-LCC NPs).<sup>1</sup>

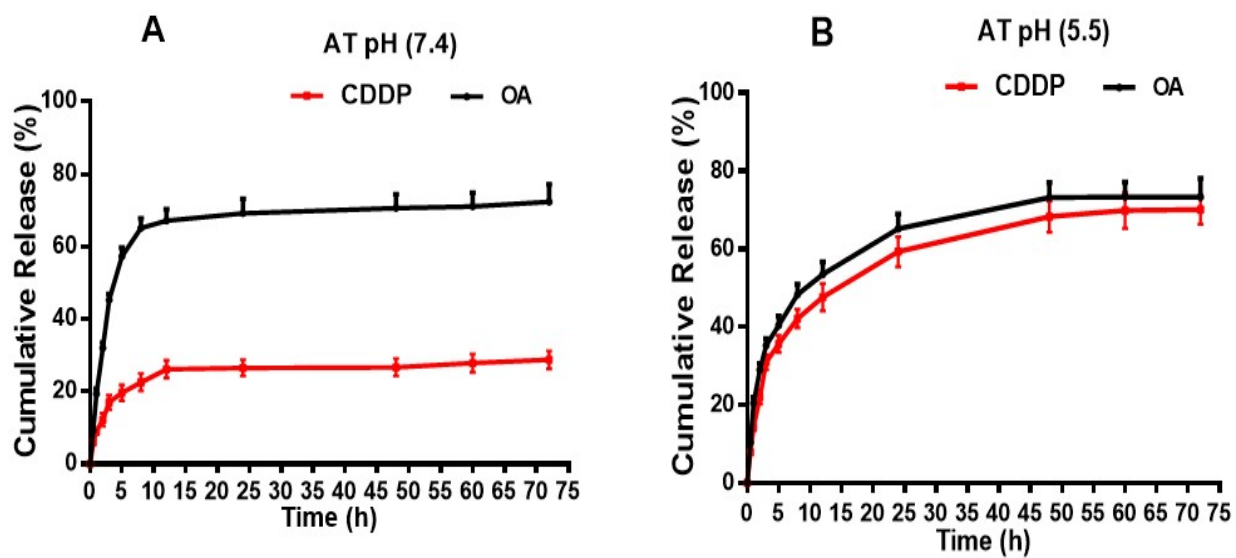

**Supplementary Fig. S2.** In vitro drug release profiles of CDDP and OA from the CDDP/OA-LCC NPs in PBS (72 h). (A) At pH 5.5; (B) At pH 7.4. <sup>1</sup>

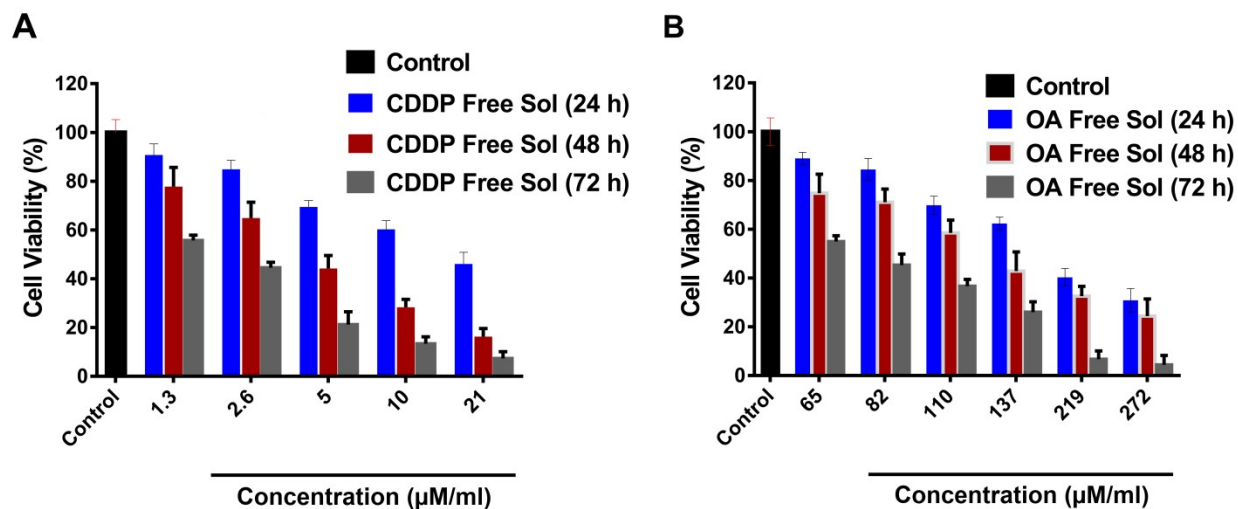

Supplementary Fig. S3. Cytotoxicity assay of free CDDP and free OA against HepG2 cells.

1

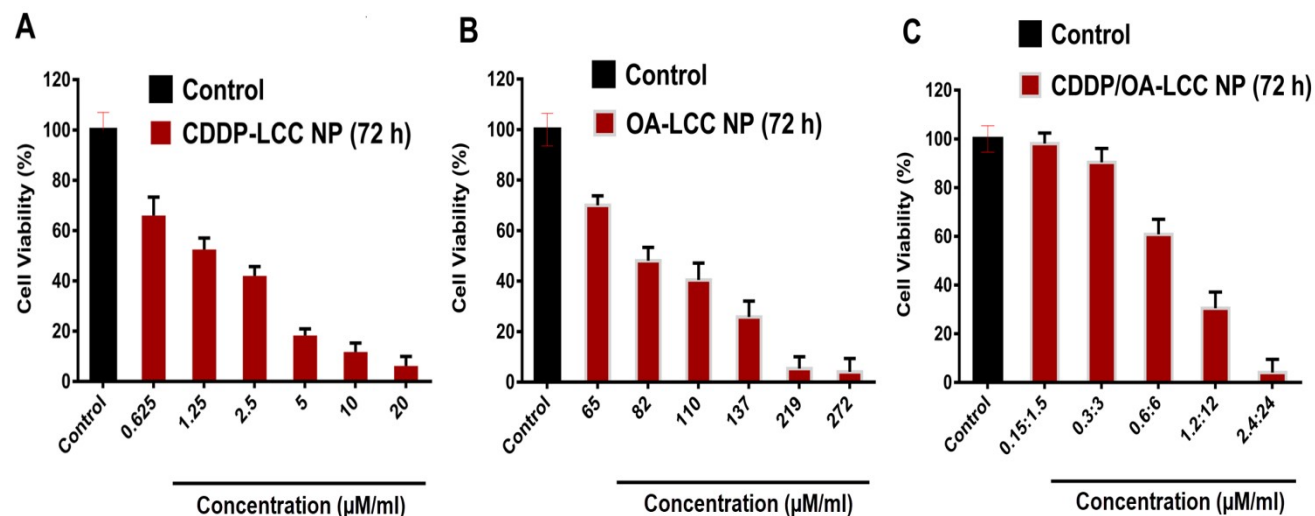

Supplementary Fig. S4. Cytotoxicity assay of the nanoparticles against HepG2 cells (72 h).

(A) CDDP-LCC NPs MTT assay; (B) OA-LCC NPs MTT assay; (C) CDDP/OA-LCC NPs MTT

assay with fixed ratios. Data presented as mean  $\pm$  SD, n=5. <sup>1</sup>

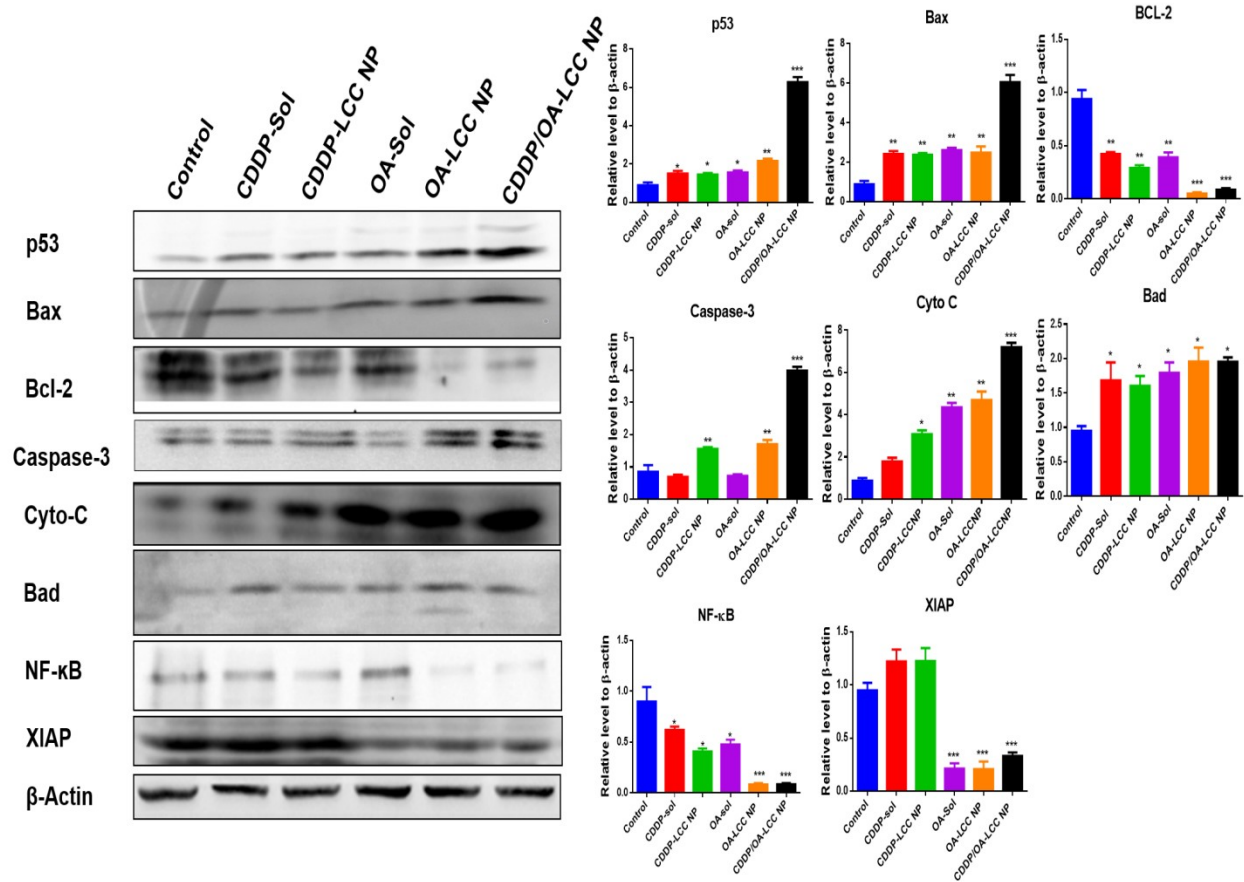

**Supplementary Fig. S5.** Western blot analysis of protein levels (p53, Bax, Bad, Cyto-C, caspase-3, NF-κB, Bcl-2 and XIAP) after treating HepG2 cells with CDDP-Sol, CDDP-LCC NP,

OA-Sol, OA-LCC NP, CDDP/OA-LCC NP *in vitro*.  $\beta$ -actin was used as a loading control.

Quantification of protein level using Image J. Data presented as mean  $\pm$  S.D. (n=3). <sup>1</sup>

### **Reference**

1. M. W. Khan , P. Zhao , A. Khan , F. Raza , S. M. Raza , M. Sarfraz , Y. Chen , M. Li , T. Yang and X. Ma , *Int. J. Nanomed.*, 2019, **14** , 3753-3771
